# Supplementary material for: Single-cell analysis of transcription kinetics across the cell cycle
Source: eLife journal article supplement (doi:10.7554/elife.12175), 2016-01-29
Supplement: supp [file elife-12175-supp-v1.zip]

Archive with 14 entries (14 files):
- elife_poa_e12175_Figure_2_figure_supplement_1.pdf
- elife_poa_e12175_Figure_1_figure_supplement_3.pdf
- elife_poa_e12175_Figure_3_figure_supplement_5.pdf
- elife_poa_e12175_Figure_3_figure_supplement_2.pdf
- elife_poa_e12175_Supplementary_File_1.docx
- elife_poa_e12175_Figure_1_figure_supplement_2.pdf
- elife_poa_e12175_Figure_1_figure_supplement_1.pdf
- elife_poa_e12175_Figure_3_figure_supplement_4.pdf
- elife_poa_e12175_Supplementary_File_2.docx
- elife_poa_e12175_Figure_3_figure_supplement_1.pdf
- elife_poa_e12175_Figure_1_figure_supplement_5.pdf
- elife_poa_e12175_Supplementary_File_3.docx
- elife_poa_e12175_Figure_1_figure_supplement_4.pdf
- elife_poa_e12175_Figure_3_figure_supplement_3.pdf
