# Supplementary material for: Single-cell analysis of transcription kinetics across the cell cycle
Source: eLife journal article supplement (doi:10.7554/elife.12175), 2016-01-29
Supplement: supp [file elife-12175-supp-v1.zip › elife_poa_e12175_Supplementary_File_3.docx]

| **Supplementary file 3. Sequences of smFISH probes** | |
| --- | --- |
| **Transcript** | **Probe sequences (5’ to 3’)** |
| *Oct4* exons (48 probes) | | tgtccagccatggggaaggt | | --- | | tggaggcccttggaagctta | | tccctccgcagaactcgtat | | tcaggctgcaaagtctccac | | ttctccaacttcacggcatt | | tcttctgcttcagcagcttg | | tggtctggctgaacaccttt | | ttcctccacccacttctcca | | tagttcgctttctcttccgg | | atctgctgtagggagggctt | | cgccggttacagaaccatac | | ggtgtccctgtagcctcata | | gtgtggtgaagtgggggctt | | agtttgaatgcatgggagag | | ccctcctcagtaaaagaatt | | ctcctgatcaacagcatcac | | aggttcgaggatccacccag | | acatggggagatccccaata | | aacttgggggactaggccca | | tcagaggaggttccctctga | | aactgttctagctccttctg | | aaagagaacgcccagggtga | | catgttcttaaggctgagct | | gtctccgatttgcatatctc | | tcagaaacatggtctccaga | | gaaccacatccttctctagc | | cttctcgttgggaatactca | | atagcctggggtgccaaagt | | tgacgggaacagagggaaag | | aaagctccaggttctcttgt | | agcttctttccccatcccac | | gtgtgtcccagtctttattt | | tgagaaggcgaagtctgaag | | tgagcctggtccgattccag | | aacctgaggtccacagtatg | | tgctttccactcgtgctcct | | tttcatgtcctgggactcct | | tgggtgtaccccaaggtgat | | aaggcctcgaagcgacagat | | gaaggttctcattgttgtcg | | cacctcacacggttctcaat | | aagctgattggcgatgtgag | | acttgatcttttgcccttct | | agaggaaaggatacagcccc | | tcaggaaaagggactgagta | | ttgccttggctcacagcatc | | ccacccctgttgtgctttta | | aatgatgagtgacagacagg | |
| *Oct4* intron (40 probes) | | aaccttaaggccaagttcct | | --- | | aacaagagctcctatcagca | | tcgtgtaaaggtgactcatg | | aagggtgtccctttcttgtt | | tgtaggccatcagacactaa | | acaacaatcgctaagctgtc | | gggccatttaagatgtgaga | | tctccaactgctcctcaaaa | | agaaatggaggcagtcatct | | tctaagttgcagcgtgtgaa | | tatgagcaatagaacggcag | | actagagtgcgacagagaaa | | atccctctgttcagctctaa | | gtcccaaagtatgacacagt | | aagcaccattttttaccccc | | aaacttgactgaaggtgagc | | aatcgatcagatctgcacct | | tggagataaaactcccctac | | ttgcttacacttgctccaga | | acacagaaactggcacttag | | gcagtgtctttggcttttct | | aaaggattctctcggcttca | | ggcttttctgtctctaacag | | taacagatggccagttgagt | | gcatgcacacaccacaaaaa | | aagtagccaaatgtccatgc | | aagggctggggtaataagat | | cccaacctcttcagtaacaa | | tctgaggctaaagtagacag | | caaggaaaggtagaaaggct | | gtgcactcacagaatgatct | | actcgcaccttgttcttaag | | attaatgccttcctagggga | | ccaaaacttgtaatcgccct | | cacacctcaatgccatttca | | caaaatggctgtcggtttct | | tagtacacagtgatggttgg | | aaatcatctgactcaccctg | | gaaaacctacacagcacact | | aaacagggactcactaggaa | |
| *Nanog* exons  (40 probes) | | ggatgaaaaactgcaggcat | | --- | | tgaagaggcaggtcttcaga | | tctgaaacctgtccttgagt | | cctttggttttgaaaccagg | | acatggaaaggcttccagat | | ttgctgcaactgtacgtaag | | tgctaaaatgcgcatggctt | | tttaagcccagatgttgcgt | | tacgtaacaagatctgacgc | | ccaaagcctagagttaacac | | aaaaagactagcatgggtgg | | gagtagccaccatatcgtta | | gcaccttaataggtgaaagc | | ttaaactagtccagctggca | | cagacccttgtaagcaagaa | | tgggactggtagaagaatca | | atggaggagagttcttgcat | | aaccactggtttttctgcca | | ttgttccaagttgggttggt | | tccaaatcactggcagagaa | | gtcacagagtagttcaggaa | | ttggaagaaggaaggaacct | | aaccacatggtggctcacaa | | gagtatatgcacctcactgt | | acagtgtataccaagaccca | | atctgagctaccctcaaact | | acatagcagttactcttggg | | tctgtgcagagcatctcagt | | tcaggacttgagagcttttg | | ctgcttatagctcaggttca | | gaatcagaccattgctagtc | | aaagtcctccccgaagttat | | cctagtggcttccaaattca | | gtctcatatttcacctggtg | | gacagctacagtgtacttac | | aaggtcaggagttcaaatcc | | gcacttattcttgggaagga | | aaacctcacccctcaaaatg | | gttggccttgaacttattgc | | ggttcatcatggtacagtca | |
| *Nanog* intron (48 probes) | | ttcggggactgaattcctta | | --- | | gggtttccagaagagtgata | | ttatattgctccgtcctgtg | | aagctaggatgttaggtctc | | actgcttctgctggagaaaa | | ttgtttggggtttggaagga | | tttacaagcctgagtactgg | | acttacaaaggctatcccca | | ccctgaaagcagcttctaaa | | atttcctagatccagcagca | | cgtttctcttatccttgacc | | ttaaaatgatcccactgggg | | ccactgagtcagctatatct | | ggacttttatctcgcctaga | | ttctaagggatagggtctca | | ccgtctcaacaaatagagac | | cagcccgttttttctactct | | aacgtatcaccggtcaaact | | gaacatattccaaagagccc | | ccaaaaaaatggggtgctca | | ccaaaggttgagagaaatgc | | ctccagatgctagctataag | | aaaaaggggacacacacttc | | gctctacacacatgctctaa | | cctgcagtctagcaaataag | | ttcagcaagagacaagtgct | | gtcagagggtccagttaatt | | ccccacccccaatttttttt | | tgggacctttcatactctac | | atccaaagactcaggtttgg | | gcagaggatctagtctatgt | | ctgagatgggagaatttgag | | cacccgcttatgttaatgac | | ccggatctctatttcagact | | tactgaagacaccactcact | | gccatttgggcaaattgcaa | | gaactgctaagtgacatcca | | gacaatgagcttcagacctt | | cacttttcccacctccaaaa | | aattatgccatctgctggca | | acactgaagacatctgtgct | | ctagctcttcggttagcttt | | ttctgctagtacaagagcag | | cacagtcctgagtttagaca | | tgctgggtgaatagaatcct | | tacctctctaccttctgagt | | aagacagcacaagagcttag | | tagcacaaatctaaagcccc | |
| *lacZ* (72 probes) | See (Skinner et al., 2013) |
