# Supplementary figures and images for: Single-cell analysis of transcription kinetics across the cell cycle
Source: eLife journal article supplement (doi:10.7554/elife.12175), 2016-01-29

# Figure 2-figure supplement 1

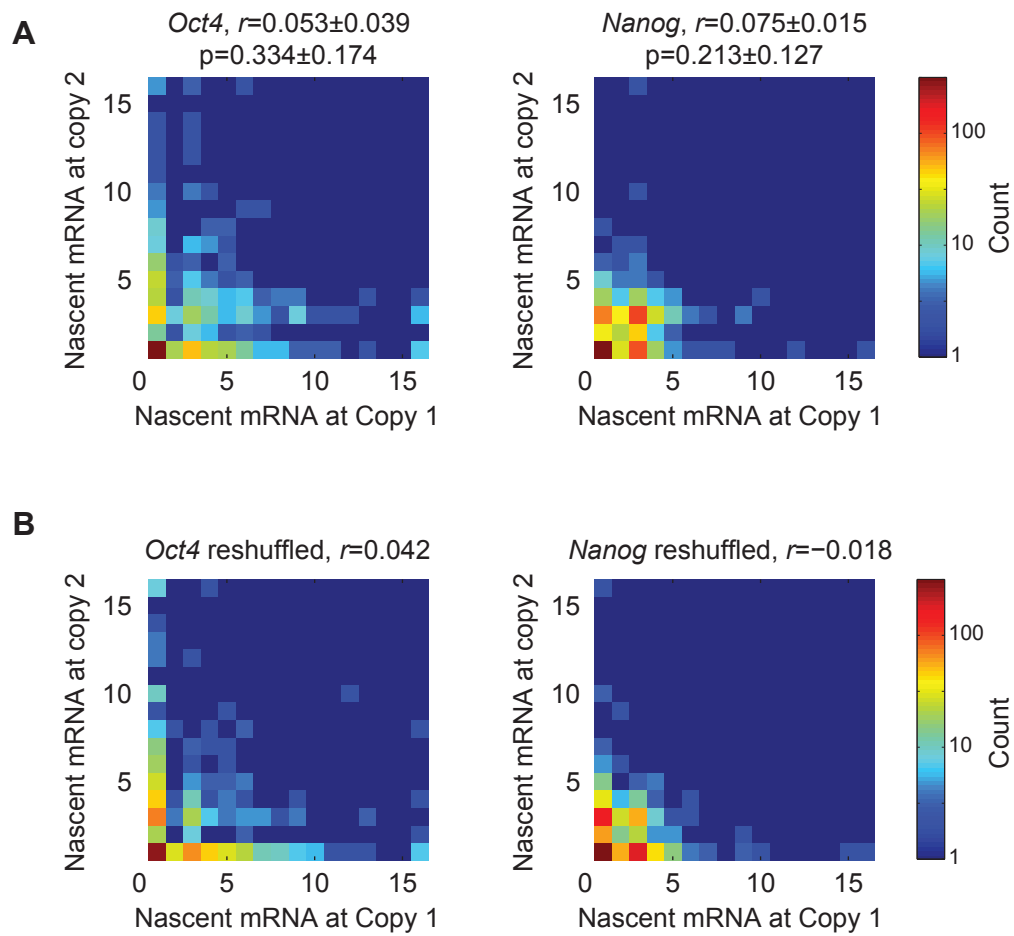

Supplement: supp [file elife-12175-supp-v1.zip › elife_poa_e12175_Figure_2_figure_supplement_1.pdf]

Figure 1-figure supplement 3

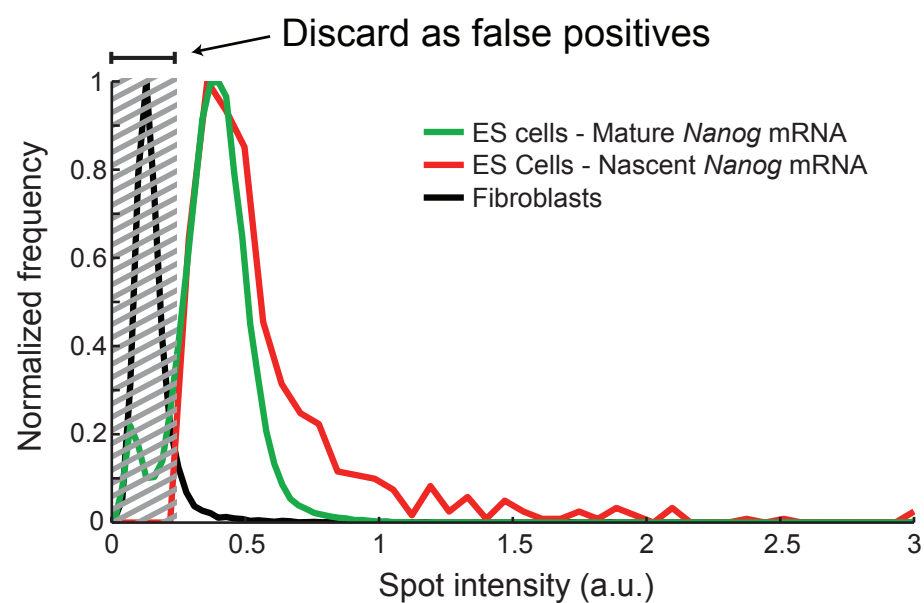

Supplement: supp [file elife-12175-supp-v1.zip › elife_poa_e12175_Figure_1_figure_supplement_3.pdf]

Figure 3-figure supplement 5

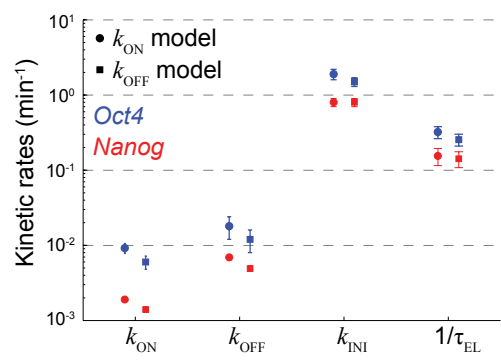

Supplement: supp [file elife-12175-supp-v1.zip › elife_poa_e12175_Figure_3_figure_supplement_5.pdf]

Figure 3-figure supplement 2

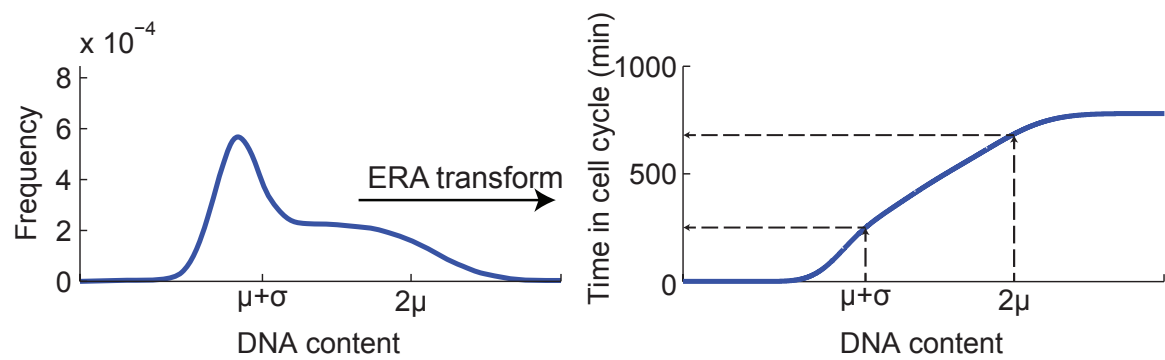

Supplement: supp [file elife-12175-supp-v1.zip › elife_poa_e12175_Figure_3_figure_supplement_2.pdf]

# Figure 1-figure supplement 2

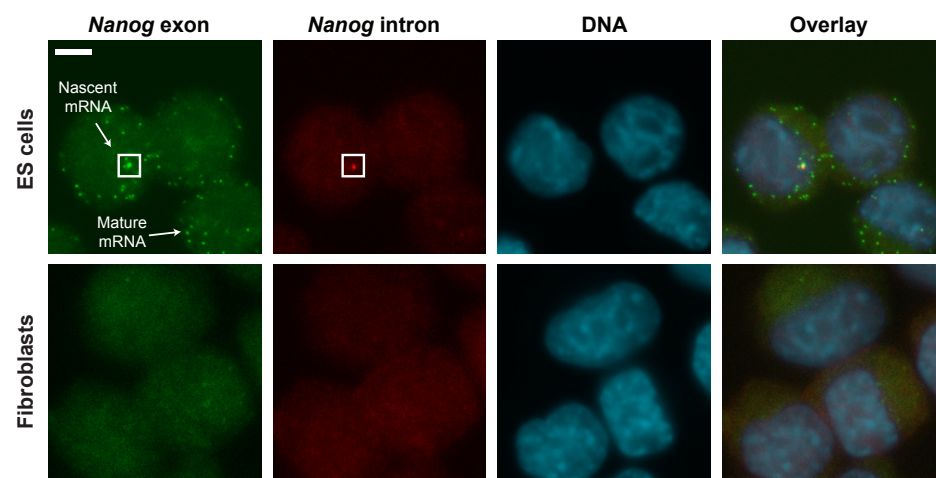

Supplement: supp [file elife-12175-supp-v1.zip › elife_poa_e12175_Figure_1_figure_supplement_2.pdf]

# Figure 1-figure supplement 1

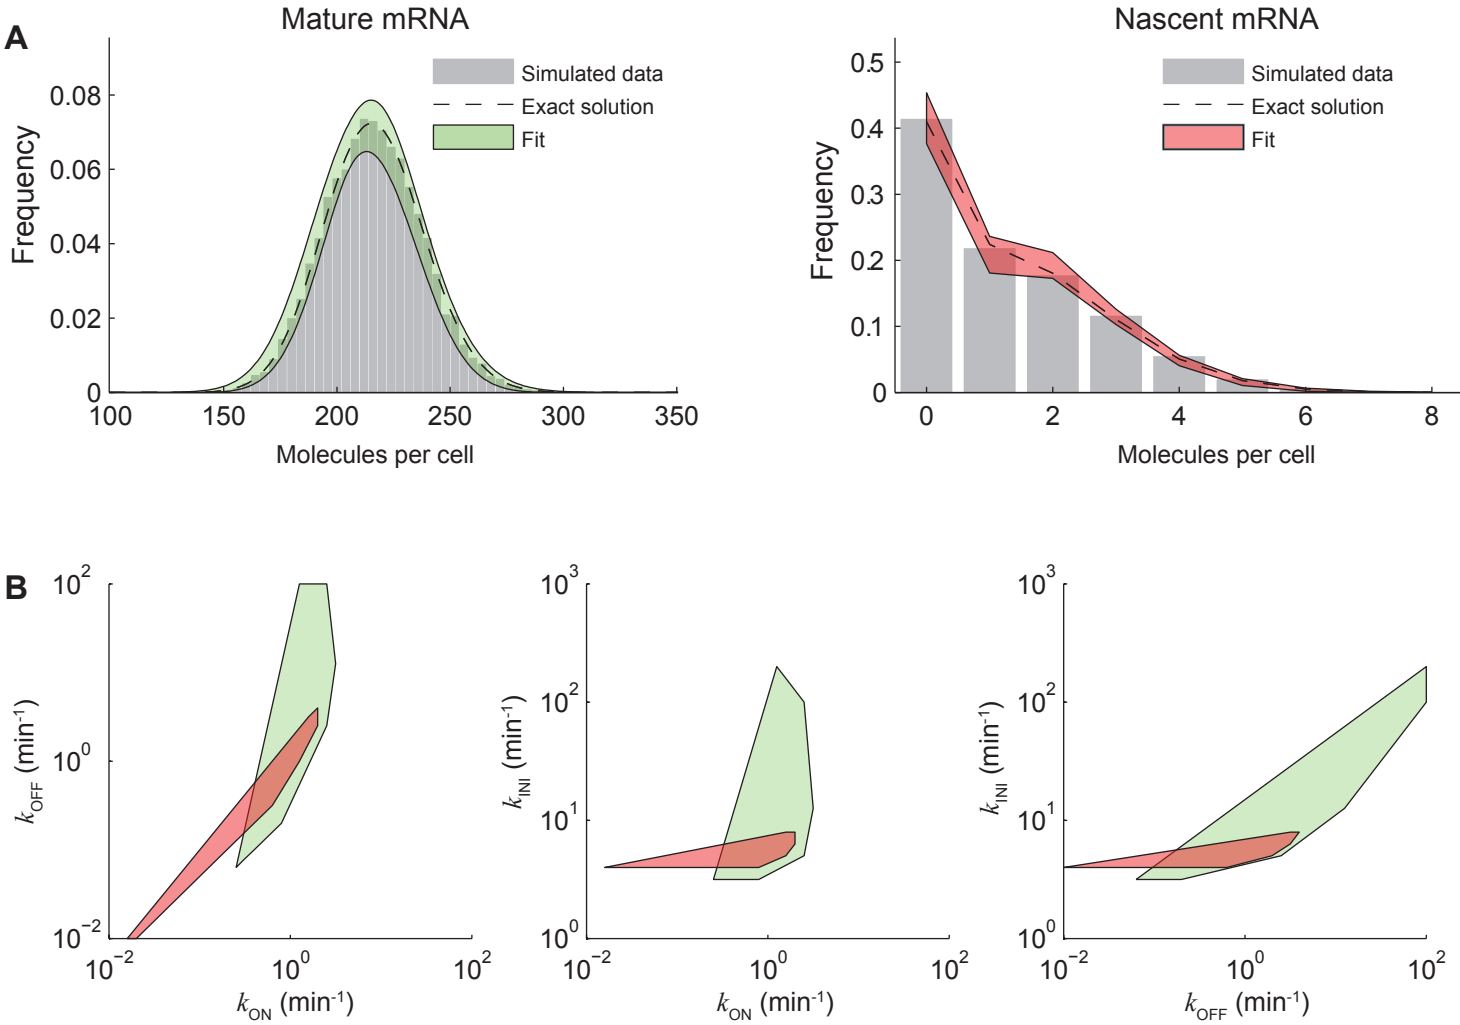

Supplement: supp [file elife-12175-supp-v1.zip › elife_poa_e12175_Figure_1_figure_supplement_1.pdf]

Figure 3-figure supplement 4

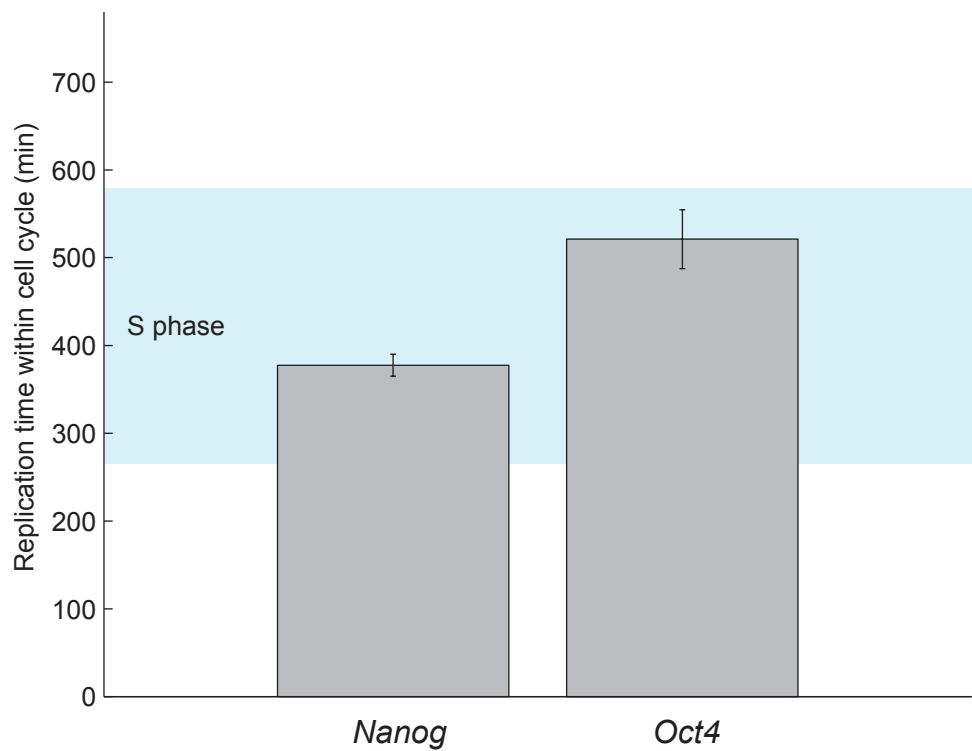

Supplement: supp [file elife-12175-supp-v1.zip › elife_poa_e12175_Figure_3_figure_supplement_4.pdf]

# Figure 3-figure supplement 1

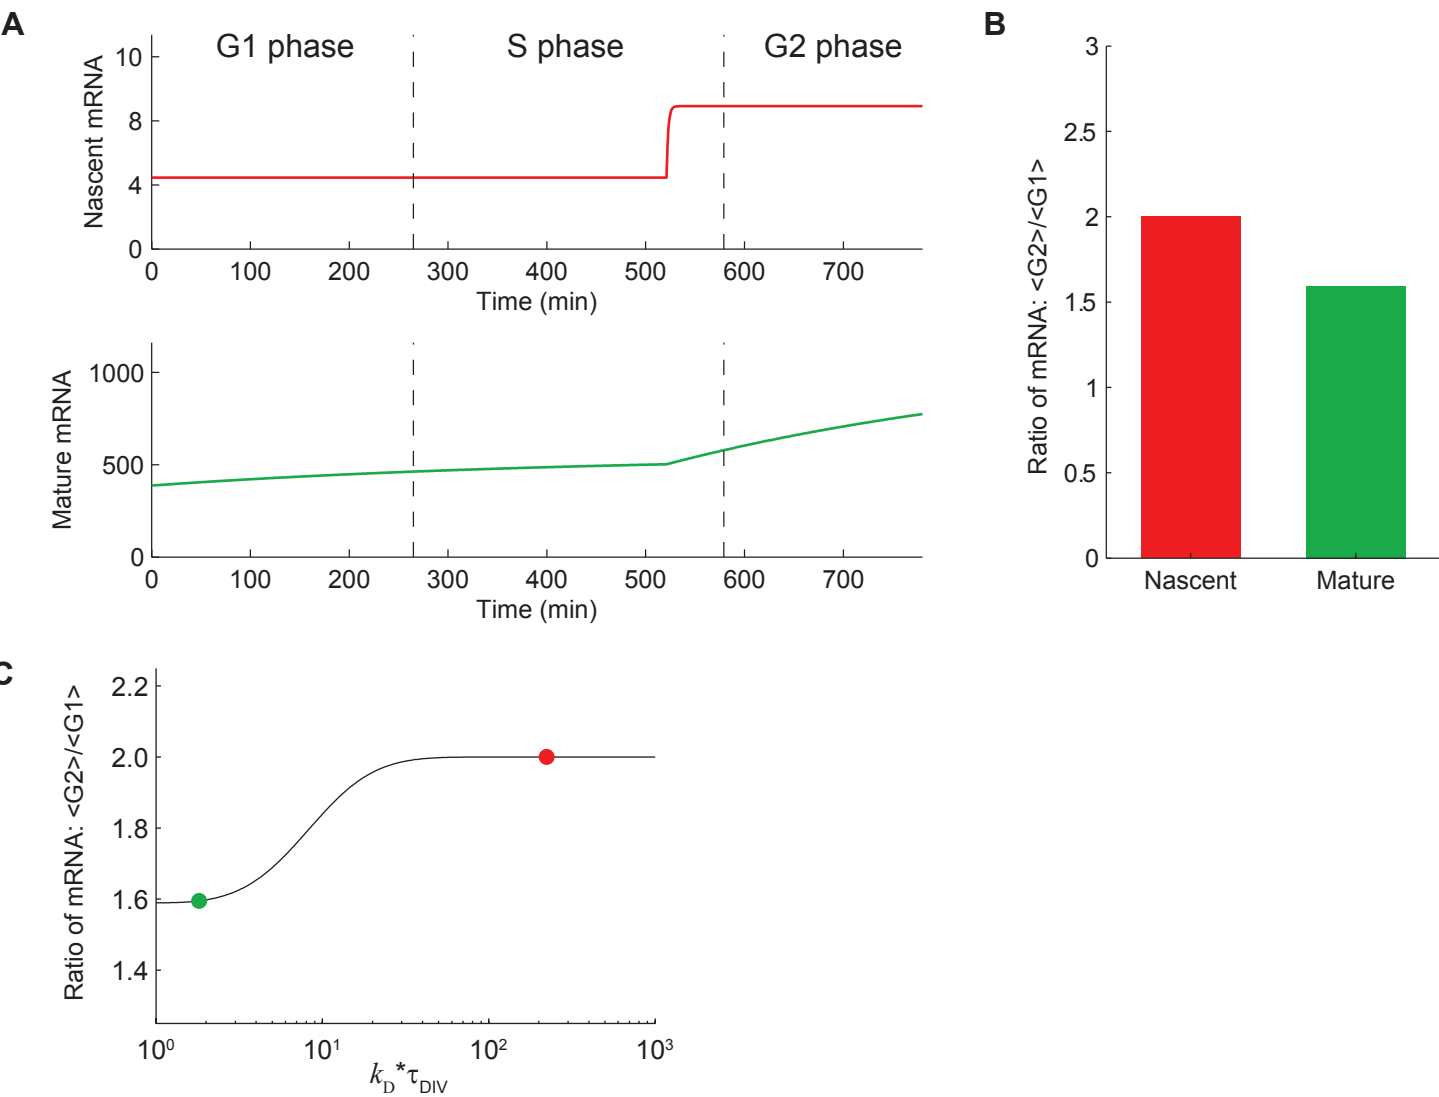

Supplement: supp [file elife-12175-supp-v1.zip › elife_poa_e12175_Figure_3_figure_supplement_1.pdf]

# Figure 1-figure supplement 5

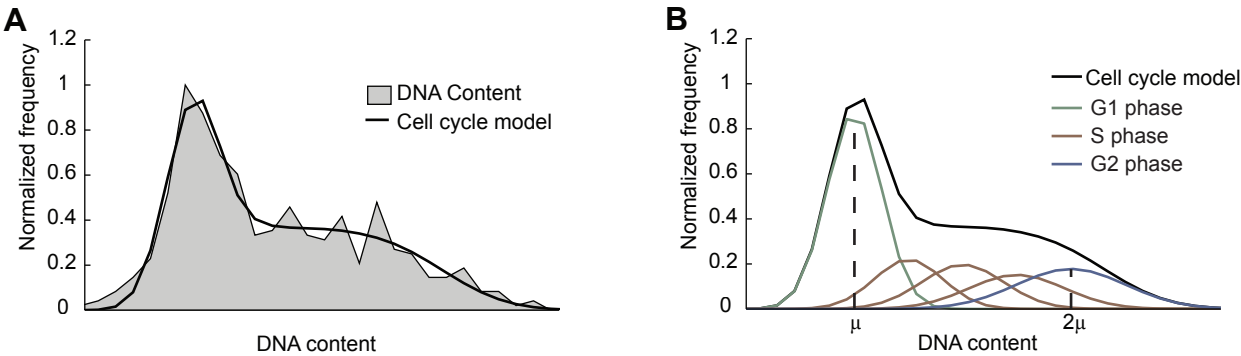

Supplement: supp [file elife-12175-supp-v1.zip › elife_poa_e12175_Figure_1_figure_supplement_5.pdf]

Figure 1-figure supplement 4

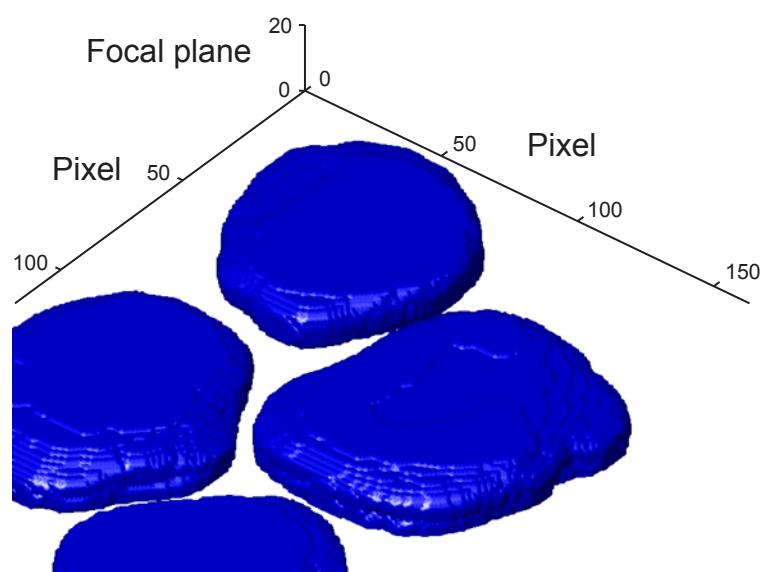

Supplement: supp [file elife-12175-supp-v1.zip › elife_poa_e12175_Figure_1_figure_supplement_4.pdf]

# Figure 3-figure supplement 3

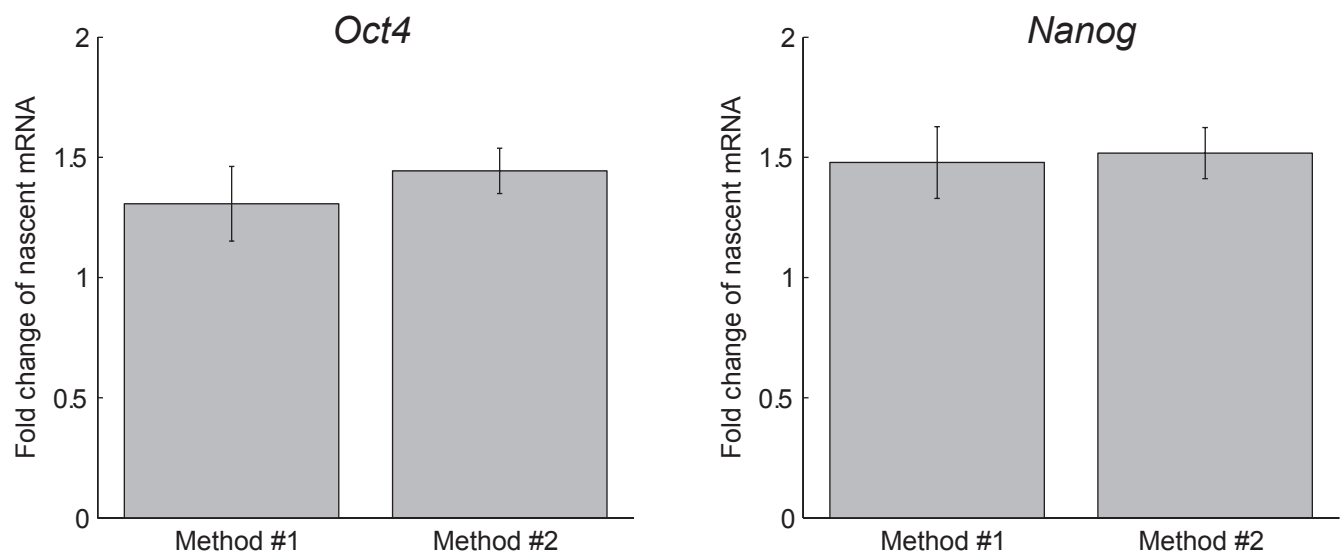

Supplement: supp [file elife-12175-supp-v1.zip › elife_poa_e12175_Figure_3_figure_supplement_3.pdf]
